# Supplementary material for: The Endothelial Glycocalyx as a Target of Excess Soluble Fms-like Tyrosine Kinase-1
Source: MDPI journal article supplement (doi:10.3390/ijms24065380), 2023-03-11
Supplement: s1 [file s1]

## Supplementary Material

### The endothelial glycocalyx as a target of excess soluble fms-like tyrosine kinase-1

Annika Schulz<sup>1</sup>, Carolin C. Drost<sup>1</sup>, Bettina Hesse<sup>1</sup>, Katrin Beul<sup>1</sup>, Göran R. Boeckel<sup>1</sup>, Alexander Lukasz<sup>1</sup>, Hermann Pavenstädt<sup>1</sup>, Marcus Brand<sup>1</sup> and Giovana S. Di Marco<sup>1,\*</sup>

Department of Internal Medicine D, University Hospital Münster, 48149 Münster, Germany;

\*Correspondence: giodimarco@gmail.com; Tel.: +49 251 8356911

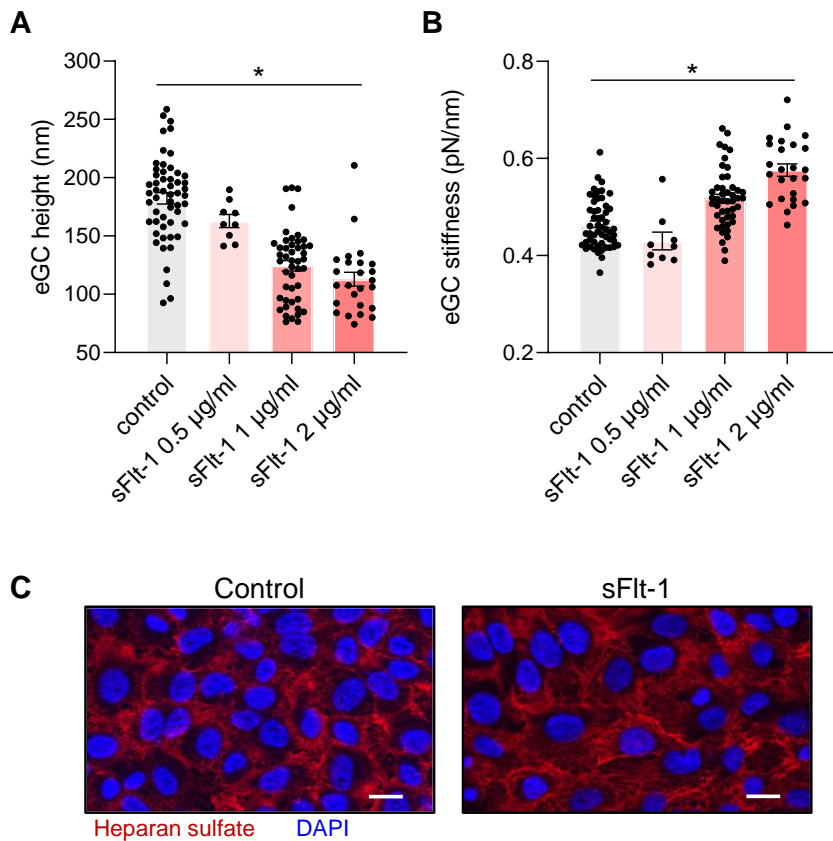

**Figure S1.** sFlt-1 leads to conformational changes of the eGC in a dose-dependent manner. EA.hy926 cells were cultured with increasing sFlt-1 (VEGFR1-Fc) concentrations for 24 h. Control cells were incubated with control protein (IgG-Fc, 1 µg/ml). eGC height (A) and stiffness (B) were measured by atomic force microscopy (AFM). (C) Representative immunofluorescence images of EA.hy926 cells treated with sFlt-1 (2 µg/ml; left panel) or control protein (2 µg/ml; right panel) and stained for anti-heparan sulfate. DAPI indicates nuclear staining. Data are given as mean  $\pm$  SEM. \*  $p < 0.001$  for linear trend determined by one-way ANOVA. eGC, endothelial glycocalyx

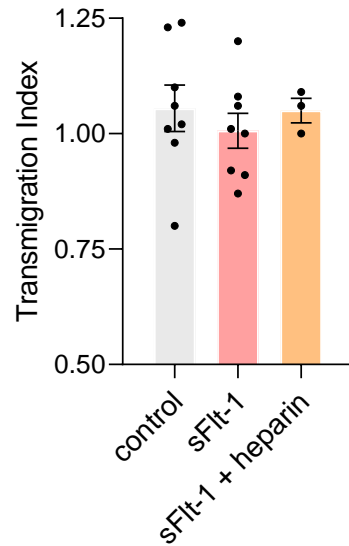

**Figure S2.** Monocyte transmigration across endothelial cells exposed to excess sFlt-1. HUVECs were cultured in transwell inserts (5  $\mu$ m pore; 25,000 cells/insert) and treated with recombinant sFlt-1 (VEGFR1-Fc, 2  $\mu$ g/ml) or control protein (IgG-Fc, 2  $\mu$ g/ml) for 24h in the presence or not of heparin (10  $\mu$ g/ml). Calcein-labeled THP-1 cells (400,000 cells/insert) were placed in the upper chamber and allowed to migrate across the endothelial monolayer for 90 min towards the monocyte chemoattractant protein-1 (MCP-1, 50 ng/ml) added in the lower chamber. Control wells were filled with medium only. Results are expressed as transmigration index, calculated by dividing the average count of migrated cells towards the MCP-1 gradient by the average count of migrated cells in the control wells. Data are given as mean  $\pm$  SEM

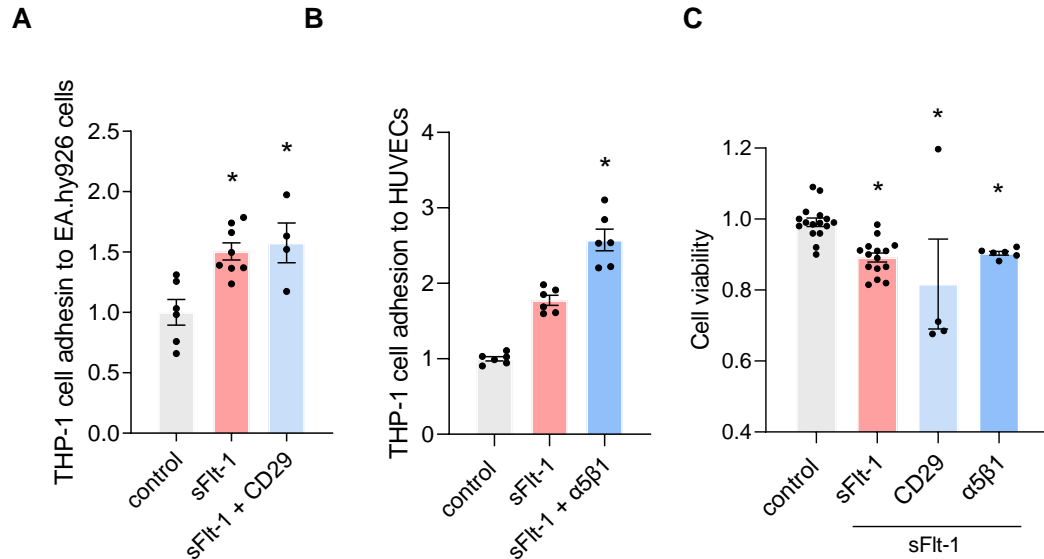

**Figure S3.** Endothelial cell adhesiveness to monocytes and viability under excess sFlt-1. EA.hy926 cells (**A**) or HUVECs (**B**, **C**) were treated with recombinant sFlt-1 (VEGFR1-Fc; 2  $\mu\text{g/ml}$ ) or control protein (IgG-Fc; 2  $\mu\text{g/ml}$ ) for 24h. As indicated, cells were also pre-treated (30 min) and co-incubated with the function-blocking antibodies to  $\beta 1$  and  $\alpha 5\beta 1$  integrins (CD29 clone Mab 13, 20  $\mu\text{g/ml}$ ;  $\alpha 5\beta 1$  clone JBS5, 10  $\mu\text{g/ml}$ ). (**A**, **B**) Monocyte adhesion to endothelial cells. (**C**) Cell viability determined using the MTT assay. The function-blocking antibodies didn't protect against sFlt-1 adverse effects. Results are expressed relative to control, and data are given as mean  $\pm$  SEM. \*  $p < 0.05$  vs. control. Kruskal-Wallis and Dunn's multiple comparisons tests were applied
